# Supplementary material for: Identification and in vitro Characterization of a Novel Phage Endolysin that Targets Gram-Negative Bacteria
Source: PubMed Central journal article supplement (PMC7143992; doi:10.3390/microorganisms8030447), 2020-03-21
Supplement: microorganisms-08-00447-s001.pdf [file microorganisms-08-00447-s001.pdf]

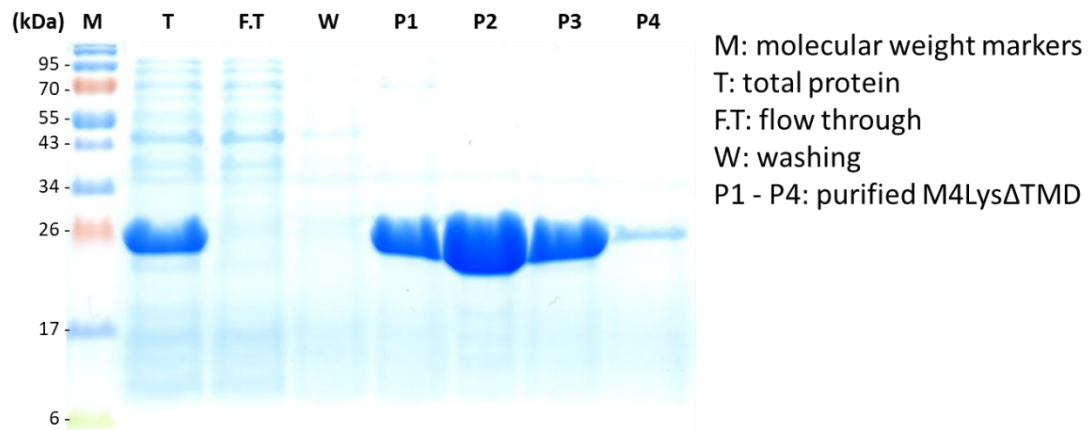

**Figure S1. Expression and purification of M4LysΔTMD.** (A) Total proteins from *Escherichia coli* BL21(DE3) cells containing the recombinant plasmid after inducing by 0.5 mM of isopropyl- $\beta$ -thiogalactopyranoside (IPTG) (T). The soluble form of recombinant M4LysΔTMD protein (24.5 kDa) was purified using affinity chromatography (P1-P4).
